# Supplementary material for: Patrolling monocytes inhibit osteosarcoma metastasis to the lung
Source: publisher site journal article supplement (doi:10.18632/aging.104041), 2020-11-16
Supplement: Supplementary file [file aging-v12i22-104041-supplementary-material-SD1.pdf]

**SUPPLEMENTARY FIGURE**

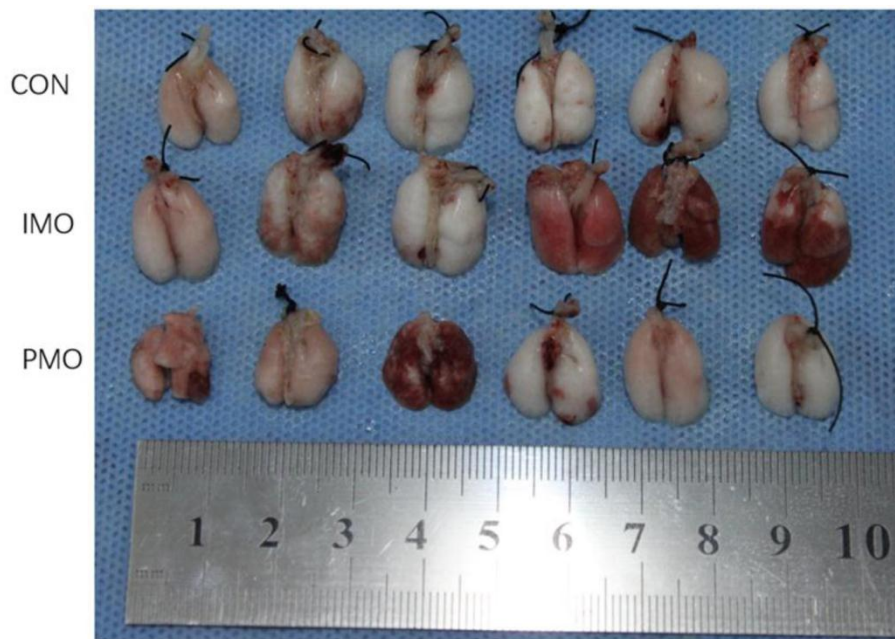

**Supplementary Figure 1. All lungs were dissected and then fixed with formalin.**
